# Supplementary material for: Comprehensive evaluation of iAMAS (v1.0) in simulating Antarctic meteorological fields with observations and reanalysis
Source: Copernicus journal article supplement (doi:10.5194/gmd-2024-229), 2025-01-24
Supplement: Supplementary file 1 [file gmd-2024-229-supplement.pdf]

# Supplement of Comprehensive evaluation of iAMAS (v1.0) in simulating Antarctic meteorological fields with observations and reanalysis

Qike Yang<sup>1</sup>, Chun Zhao<sup>1,2,3,\*</sup>, Jiawang Feng<sup>1</sup>, Gudongze Li<sup>1</sup>, Jun Gu<sup>1</sup>, Zihan Xia<sup>1</sup>, Mingyue Xu<sup>1</sup>, and Zining Yang<sup>1</sup>

<sup>1</sup>Deep Space Exploration Laboratory / School of Earth and Space Sciences / CMA-USTC Laboratory of Fengyun Remote Sensing / State Key Laboratory of Fire Science / Institute of Advanced Interdisciplinary Research on High-Performance Computing Systems and Software, University of Science and Technology of China, Hefei 230026, China

<sup>2</sup>Laoshan Laboratory, Qingdao, China

<sup>3</sup>CAS Center for Excellence in Comparative Planetology, University of Science and Technology of China, Hefei, China

**Correspondence:** Chun Zhao (chunzhao@ustc.edu.cn)

**Table S1.** RMSE (BIAS in parentheses) in 5-15 km temperature for ERA5 and iAMAS. The unit is °C.

| Site (Month)     | ERA5         | U120km       | U60km        | V16km        | V4km         |
|------------------|--------------|--------------|--------------|--------------|--------------|
| McMurdo (Jan)    | 0.85 (-0.32) | 1.50 (-0.52) | 1.40 (-0.43) | 1.49 (-0.42) | 1.53 (-0.45) |
| McMurdo (Apr)    | 1.01 (-0.17) | 1.63 (-0.12) | 1.54 (0.08)  | 1.52 (0.06)  | 1.57 (0.04)  |
| McMurdo (Jul)    | 0.75 (0.07)  | 2.06 (-0.44) | 1.88 (-0.48) | 1.43 (-0.01) | 1.35 (-0.09) |
| McMurdo (Oct)    | 0.92 (-0.02) | 1.57 (-0.17) | 1.58 (-0.24) | 1.56 (0.27)  | 1.50 (0.09)  |
| South Pole (Jan) | 0.75 (-0.46) | 1.59 (-0.82) | 1.61 (-0.89) | 1.45 (-0.86) | 1.38 (-0.80) |
| South Pole (Apr) | 0.71 (-0.09) | 1.37 (-0.52) | 1.35 (-0.32) | 1.40 (-0.18) | 1.31 (-0.19) |
| South Pole (Jul) | 0.74 (0.34)  | 1.44 (-0.38) | 1.42 (-0.02) | 1.38 (0.13)  | 1.34 (0.10)  |
| South Pole (Oct) | 0.62 (0.04)  | 1.28 (-0.37) | 1.27 (-0.09) | 1.31 (0.03)  | 1.26 (0.09)  |
| Dome C (Jan)     | 0.61 (-0.25) | 1.32 (-0.38) | 1.09 (-0.38) | 1.05 (-0.40) | 1.09 (-0.35) |
| Dome C (Apr)     | 0.52 (-0.10) | 1.80 (-1.04) | 1.47 (-0.83) | 1.20 (-0.60) | 1.20 (-0.59) |
| Dome C (Jul)     | 0.56 (0.10)  | 1.32 (-0.27) | 1.29 (-0.26) | 1.21 (-0.19) | 1.18 (-0.22) |
| Dome C (Oct)     | 0.55 (0.15)  | 1.43 (-0.32) | 1.10 (-0.25) | 1.13 (-0.10) | 0.95 (-0.05) |

**Table S2.** RMSE (BIAS in parentheses) in 15-25 km temperature for ERA5 and iAMAS. The unit is °C. Where "nan" means missing value.

| Site (Month)     | ERA5         | U120km        | U60km         | V16km         | V4km          |
|------------------|--------------|---------------|---------------|---------------|---------------|
| McMurdo (Jan)    | 1.24 (-1.05) | 1.71 (-1.51)  | 1.66 (-1.51)  | 1.76 (-1.61)  | 1.84 (-1.57)  |
| McMurdo (Apr)    | 1.12 (-0.64) | 2.10 (0.20)   | 2.21 (0.39)   | 2.24 (0.35)   | 2.18 (0.33)   |
| McMurdo (Jul)    | nan (nan)    | nan (nan)     | nan (nan)     | nan (nan)     | nan (nan)     |
| McMurdo (Oct)    | 1.28 (0.02)  | 2.70 (0.00)   | 2.68 (0.40)   | 2.62 (-0.08)  | 2.67 (-0.00)  |
| South Pole (Jan) | 0.86 (-0.61) | 1.54 (-1.36)  | 1.57 (-1.38)  | 1.59 (-1.40)  | 1.60 (-1.41)  |
| South Pole (Apr) | 0.69 (-0.15) | 1.40 (0.05)   | 1.51 (0.15)   | 1.50 (0.40)   | 1.52 (0.40)   |
| South Pole (Jul) | 0.94 (0.28)  | 2.71 (-1.85)  | 2.52 (-1.49)  | 2.03 (-1.11)  | 1.76 (-1.09)  |
| South Pole (Oct) | 1.36 (-0.43) | 3.52 (-2.29)  | 3.77 (-2.65)  | 3.57 (-2.33)  | 3.50 (-2.30)  |
| Dome C (Jan)     | 0.68 (-0.27) | 1.31 (-1.02)  | 1.30 (-1.03)  | 1.39 (-1.02)  | 1.44 (-1.06)  |
| Dome C (Apr)     | 0.81 (-0.22) | 3.32 (-2.45)  | 3.22 (-2.25)  | 3.04 (-2.02)  | 3.10 (-2.16)  |
| Dome C (Jul)     | nan (nan)    | nan (nan)     | nan (nan)     | nan (nan)     | nan (nan)     |
| Dome C (Oct)     | 1.32 (-0.76) | 11.62 (-8.68) | 11.38 (-8.06) | 11.09 (-7.71) | 11.27 (-7.98) |

**Table S3.** RMSE (BIAS in parentheses) in 5-15 km pressure for ERA5 and iAMAS. The unit is hPa.

| Site (Month)     | ERA5        | U120km       | U60km        | V16km        | V4km         |
|------------------|-------------|--------------|--------------|--------------|--------------|
| McMurdo (Jan)    | 0.50 (0.28) | 1.17 (-0.35) | 1.04 (-0.34) | 1.08 (-0.26) | 1.03 (-0.14) |
| McMurdo (Apr)    | 0.55 (0.39) | 1.56 (-0.71) | 1.30 (-0.50) | 0.88 (-0.34) | 0.80 (-0.16) |
| McMurdo (Jul)    | 0.58 (0.31) | 2.99 (-1.27) | 3.03 (-1.30) | 2.52 (-0.90) | 2.38 (-0.71) |
| McMurdo (Oct)    | 0.69 (0.51) | 1.82 (-0.33) | 1.70 (-0.42) | 1.37 (-0.26) | 1.04 (-0.02) |
| South Pole (Jan) | 0.65 (0.43) | 0.63 (-0.09) | 0.61 (-0.06) | 0.57 (-0.05) | 0.60 (-0.04) |
| South Pole (Apr) | 0.88 (0.72) | 0.67 (0.03)  | 0.70 (0.07)  | 0.79 (0.02)  | 0.68 (0.03)  |
| South Pole (Jul) | 0.95 (0.85) | 1.56 (-0.08) | 1.33 (0.11)  | 1.19 (-0.10) | 1.20 (-0.12) |
| South Pole (Oct) | 0.72 (0.40) | 1.29 (-0.01) | 1.58 (-0.01) | 1.30 (-0.01) | 1.17 (-0.01) |
| Dome C (Jan)     | 1.51 (1.37) | 1.33 (0.76)  | 1.11 (0.80)  | 1.19 (0.88)  | 1.20 (0.90)  |
| Dome C (Apr)     | 1.61 (1.62) | 1.26 (0.58)  | 1.13 (0.63)  | 1.00 (0.65)  | 1.06 (0.74)  |
| Dome C (Jul)     | 3.13 (1.73) | 3.73 (-0.37) | 3.29 (0.38)  | 3.42 (0.45)  | 3.29 (0.54)  |
| Dome C (Oct)     | 1.67 (1.68) | 2.12 (1.30)  | 1.81 (1.30)  | 1.59 (1.22)  | 1.44 (1.16)  |

**Table S4.** RMSE (BIAS in parentheses) in 15-25 km pressure for ERA5 and iAMAS. The unit is hPa. Where "nan" means missing value

| Site (Month)     | ERA5        | U120km       | U60km        | V16km        | V4km         |
|------------------|-------------|--------------|--------------|--------------|--------------|
| McMurdo (Jan)    | 0.61 (0.51) | 0.39 (-0.38) | 0.37 (-0.34) | 0.36 (-0.32) | 0.34 (-0.30) |
| McMurdo (Apr)    | 0.56 (0.36) | 0.27 (-0.10) | 0.27 (-0.01) | 0.29 (-0.01) | 0.29 (0.01)  |
| McMurdo (Jul)    | nan (nan)   | nan (nan)    | nan (nan)    | nan (nan)    | nan (nan)    |
| McMurdo (Oct)    | 0.71 (0.55) | 0.32 (-0.10) | 0.31 (-0.07) | 0.31 (-0.03) | 0.32 (0.01)  |
| South Pole (Jan) | 0.58 (0.35) | 0.25 (-0.23) | 0.25 (-0.22) | 0.23 (-0.21) | 0.22 (-0.20) |
| South Pole (Apr) | 0.78 (0.57) | 0.13 (-0.01) | 0.13 (0.05)  | 0.16 (0.09)  | 0.16 (0.11)  |
| South Pole (Jul) | 0.65 (0.59) | 0.23 (-0.21) | 0.18 (-0.17) | 0.13 (-0.12) | 0.11 (-0.09) |
| South Pole (Oct) | 0.68 (0.46) | 0.17 (-0.05) | 0.16 (-0.04) | 0.15 (-0.01) | 0.15 (-0.00) |
| Dome C (Jan)     | 0.80 (0.55) | 0.12 (0.03)  | 0.11 (0.04)  | 0.12 (0.05)  | 0.12 (0.06)  |
| Dome C (Apr)     | 0.93 (0.70) | 0.36 (-0.14) | 0.34 (-0.10) | 0.32 (-0.05) | 0.32 (-0.02) |
| Dome C (Jul)     | nan (nan)   | nan (nan)    | nan (nan)    | nan (nan)    | nan (nan)    |
| Dome C (Oct)     | 0.92 (0.65) | 0.50 (-0.33) | 0.44 (-0.25) | 0.41 (-0.21) | 0.40 (-0.21) |

**Table S5.** RMSE (BIAS in parentheses) in 5-15 km relative humidity for ERA5 and iAMAS. The unit is g/kg.

| Site (Month)     | ERA5             | U120km           | U60km            | V16km            | V4km             |
|------------------|------------------|------------------|------------------|------------------|------------------|
| McMurdo (Jan)    | 0.0408 (0.0050)  | 0.0484 (0.0022)  | 0.0480 (0.0021)  | 0.0567 (0.0032)  | 0.0550 (0.0032)  |
| McMurdo (Apr)    | 0.0140 (0.0039)  | 0.0180 (0.0027)  | 0.0187 (0.0030)  | 0.0202 (0.0034)  | 0.0207 (0.0034)  |
| McMurdo (Jul)    | 0.0146 (0.0049)  | 0.0152 (0.0048)  | 0.0109 (0.0046)  | 0.0119 (0.0050)  | 0.0135 (0.0049)  |
| McMurdo (Oct)    | 0.0161 (0.0042)  | 0.0204 (0.0040)  | 0.0193 (0.0037)  | 0.0194 (0.0039)  | 0.0202 (0.0041)  |
| South Pole (Jan) | 0.0156 (-0.0003) | 0.0143 (-0.0005) | 0.0170 (-0.0003) | 0.0163 (-0.0004) | 0.0161 (-0.0004) |
| South Pole (Apr) | 0.0102 (0.0033)  | 0.0110 (0.0033)  | 0.0119 (0.0034)  | 0.0118 (0.0034)  | 0.0118 (0.0033)  |
| South Pole (Jul) | 0.0037 (0.0031)  | 0.0042 (0.0035)  | 0.0049 (0.0038)  | 0.0049 (0.0036)  | 0.0048 (0.0037)  |
| South Pole (Oct) | 0.0050 (0.0029)  | 0.0055 (0.0033)  | 0.0064 (0.0034)  | 0.0062 (0.0033)  | 0.0062 (0.0033)  |
| Dome C (Jan)     | 0.0094 (-0.0009) | 0.0122 (-0.0008) | 0.0108 (-0.0008) | 0.0104 (-0.0008) | 0.0110 (-0.0007) |
| Dome C (Apr)     | 0.0087 (0.0030)  | 0.0097 (0.0031)  | 0.0093 (0.0031)  | 0.0091 (0.0030)  | 0.0090 (0.0030)  |
| Dome C (Jul)     | 0.0037 (0.0033)  | 0.0047 (0.0038)  | 0.0044 (0.0037)  | 0.0044 (0.0037)  | 0.0046 (0.0038)  |
| Dome C (Oct)     | 0.0033 (0.0025)  | 0.0045 (0.0032)  | 0.0043 (0.0032)  | 0.0040 (0.0031)  | 0.0040 (0.0030)  |

**Table S6.** RMSE (BIAS in parentheses) in 15-25 km specific humidity for ERA5 and iAMAS. The unit is g/kg. Where "nan" means missing value

| Site (Month)     | ERA5             | U120km           | U60km            | V16km            | V4km             |
|------------------|------------------|------------------|------------------|------------------|------------------|
| McMurdo (Jan)    | 0.0242 (-0.0210) | 0.0246 (-0.0211) | 0.0246 (-0.0210) | 0.0245 (-0.0212) | 0.0242 (-0.0210) |
| McMurdo (Apr)    | 0.0027 (-0.0004) | 0.0028 (-0.0004) | 0.0028 (-0.0005) | 0.0027 (-0.0002) | 0.0027 (-0.0003) |
| McMurdo (Jul)    | nan (nan)        |
| McMurdo (Oct)    | 0.0092 (0.0022)  | 0.0086 (0.0026)  | 0.0134 (0.0025)  | 0.0095 (0.0025)  | 0.0094 (0.0026)  |
| South Pole (Jan) | 0.0659 (-0.0497) | 0.0652 (-0.0485) | 0.0658 (-0.0496) | 0.0659 (-0.0497) | 0.0659 (-0.0496) |
| South Pole (Apr) | 0.0029 (0.0029)  | 0.0031 (0.0030)  | 0.0030 (0.0030)  | 0.0031 (0.0030)  | 0.0030 (0.0030)  |
| South Pole (Jul) | 0.0026 (0.0023)  | 0.0026 (0.0002)  | 0.0027 (0.0000)  | 0.0027 (0.0003)  | 0.0026 (0.0004)  |
| South Pole (Oct) | 0.0170 (0.0023)  | 0.0172 (0.0026)  | 0.0180 (0.0027)  | 0.0169 (0.0026)  | 0.0169 (0.0027)  |
| Dome C (Jan)     | 0.0590 (-0.0439) | 0.0592 (-0.0440) | 0.0590 (-0.0439) | 0.0590 (-0.0438) | 0.0590 (-0.0437) |
| Dome C (Apr)     | 0.0027 (0.0008)  | 0.0027 (0.0009)  | 0.0027 (0.0010)  | 0.0027 (0.0009)  | 0.0027 (0.0009)  |
| Dome C (Jul)     | nan (nan)        |
| Dome C (Oct)     | 0.1127 (-0.0098) | 0.1144 (-0.0106) | 0.1125 (-0.0104) | 0.1122 (-0.0103) | 0.1122 (-0.0102) |

**Table S7.** RMSE (BIAS in parentheses) in 5-15 km wind speed for ERA5 and iAMAS. The unit is  $\text{m s}^{-1}$ .

| Site (Month)     | ERA5         | U120km       | U60km        | V16km        | V4km         |
|------------------|--------------|--------------|--------------|--------------|--------------|
| McMurdo (Jan)    | 1.51 (-0.13) | 3.73 (-0.07) | 3.71 (-0.01) | 3.86 (0.06)  | 3.76 (0.24)  |
| McMurdo (Apr)    | 1.72 (-0.09) | 4.34 (-1.20) | 3.51 (-0.77) | 3.33 (-0.43) | 3.18 (-0.21) |
| McMurdo (Jul)    | 2.32 (-0.08) | 4.70 (-0.41) | 4.52 (-0.01) | 4.49 (-0.35) | 4.66 (-0.15) |
| McMurdo (Oct)    | 2.32 (-0.08) | 5.02 (0.79)  | 4.74 (0.65)  | 5.07 (0.20)  | 4.85 (-0.22) |
| South Pole (Jan) | 1.30 (0.06)  | 1.79 (-0.24) | 1.90 (-0.21) | 1.70 (-0.15) | 1.78 (-0.11) |
| South Pole (Apr) | 1.70 (0.31)  | 2.56 (0.53)  | 2.80 (0.93)  | 2.86 (0.69)  | 2.70 (0.82)  |
| South Pole (Jul) | 2.02 (-0.39) | 6.94 (-0.58) | 6.48 (-0.25) | 4.57 (-0.25) | 4.16 (0.16)  |
| South Pole (Oct) | 2.00 (-0.16) | 3.87 (-0.41) | 3.96 (0.15)  | 4.11 (-0.13) | 3.94 (-0.15) |
| Dome C (Jan)     | 1.34 (-0.12) | 2.40 (-0.73) | 2.02 (-0.39) | 1.98 (-0.34) | 1.85 (-0.23) |
| Dome C (Apr)     | 1.52 (-0.03) | 2.92 (-0.88) | 2.30 (-0.57) | 2.15 (-0.35) | 2.19 (-0.18) |
| Dome C (Jul)     | 1.53 (-0.27) | 5.60 (-1.78) | 4.47 (-0.78) | 4.66 (-0.45) | 4.72 (-0.42) |
| Dome C (Oct)     | 1.43 (-0.15) | 3.59 (-0.21) | 3.39 (0.05)  | 2.59 (0.07)  | 2.61 (0.02)  |

**Table S8.** RMSE (BIAS in parentheses) in 15-25 km wind speed for ERA5 and iAMAS. The unit is  $\text{m s}^{-1}$ . Where "nan" means missing value

| Site (Month)     | ERA5         | U120km       | U60km        | V16km        | V4km         |
|------------------|--------------|--------------|--------------|--------------|--------------|
| McMurdo (Jan)    | 1.54 (-0.35) | 1.59 (-0.54) | 1.64 (-0.55) | 1.82 (-0.24) | 1.86 (-0.34) |
| McMurdo (Apr)    | 2.33 (0.11)  | 3.14 (0.75)  | 3.24 (1.25)  | 3.52 (0.66)  | 3.27 (0.76)  |
| McMurdo (Jul)    | nan (nan)    |
| McMurdo (Oct)    | 2.29 (-0.24) | 2.64 (0.59)  | 2.89 (0.97)  | 2.99 (0.13)  | 3.10 (0.65)  |
| South Pole (Jan) | 1.84 (-0.54) | 1.82 (-0.48) | 1.84 (-0.35) | 1.83 (-0.34) | 1.87 (-0.20) |
| South Pole (Apr) | 2.51 (0.08)  | 6.51 (5.02)  | 6.80 (5.35)  | 6.15 (4.79)  | 6.21 (4.91)  |
| South Pole (Jul) | 3.25 (0.69)  | 3.69 (0.68)  | 3.85 (1.53)  | 3.43 (1.12)  | 3.61 (0.78)  |
| South Pole (Oct) | 2.94 (-0.59) | 3.60 (0.02)  | 3.85 (-0.06) | 3.78 (-0.22) | 3.79 (-0.22) |
| Dome C (Jan)     | 1.64 (-0.35) | 1.70 (-0.65) | 1.71 (-0.53) | 1.71 (-0.48) | 1.84 (-0.35) |
| Dome C (Apr)     | 2.58 (-0.49) | 3.82 (-1.58) | 3.83 (-1.26) | 4.15 (-0.96) | 3.93 (-1.28) |
| Dome C (Jul)     | nan (nan)    |
| Dome C (Oct)     | 3.65 (-1.20) | 8.24 (-5.59) | 8.07 (-3.99) | 9.46 (-4.49) | 8.18 (-4.04) |
